# Supplementary material for: Mesenchymal Stem Cells Use in the Treatment of Tendon Disorders: A Systematic Review and Meta-Analysis of Prospective Clinical Studies
Source: PubMed Central journal article supplement — Ann Rehabil Med. 2021 Aug 30;45(4):274–83. doi: 10.5535/arm.21078 (PMC8435464; doi:10.5535/arm.21078), 2021-08-30
Supplement: arm-21078-suppl1.pdf [file arm-21078-suppl1.pdf]

## SUPPLEMENTARY MATERIALS

### Supplement A. Searching queries

#### Queries

1. Population

Tendinopathy OR Tendon OR Tendon disorder OR Tendon injuries OR Tendinosis OR Tendinitis OR Tennis elbow OR Elbow Tendinopathy OR Lateral epicondylitis OR Lateral epicondylosis OR Golfer's elbow OR Rotator cuff OR Rotator Cuff Injuries OR De Quervain disease OR Jumper's knee OR Achilles tendon

2. Intervention

Stem cells OR Mesenchymal stem cells OR Progenitor cells OR Mother cells OR Multipotent OR Pluripotent OR Totipotent

3. Study design

Prospective clinical study

**PubMed (20210302), 660 articles**

(Tendinopathy[MeSH] OR Tendinopathy OR Tendon OR "Tendon disorder" OR "Tendon injuries" OR Tendinosis OR Tendinitis OR "Tennis elbow"[MeSH] OR "Elbow Tendinopathy"[MeSH] OR "Tennis elbow" OR "Lateral epicondylitis" OR "Lateral epicondylosis" OR "Golfer's elbow" OR "Rotator Cuff"[MeSH] OR "Rotator cuff" OR "Rotator Cuff Injuries"[MeSH] OR "De Quervain Disease"[MeSH] OR "De Quervain disease" OR "Jumper's knee" OR "Patellar tendon" OR Achilles OR "Achilles Tendon"[MeSH]) AND ("Stem Cells"[MeSH] OR "Stem cells" OR "Mesenchymal Stem Cells"[MeSH] OR "Mesenchymal stem cells" OR "Progenitor cells" OR "Mother cells" OR Multipotent OR Pluripotent OR Totipotent) AND Humans[Filter]

**EMBASE (20210302), 436 articles**

('Tendinopathy'/exp OR 'Tendon'/exp OR 'Tendon disorder'/exp OR 'Tendon injuries'/exp OR 'Tendinosis'/exp OR 'Tendinitis'/exp OR 'Tennis elbow'/exp OR 'Elbow Tendinopathy'/exp OR 'Lateral epicondylitis'/exp OR 'Lateral epicondylosis'/exp OR 'Golfers elbow'/exp OR 'Rotator cuff'/exp OR 'Rotator Cuff Injuries'/exp OR 'De Quervain disease'/exp OR 'Jumpers knee'/exp OR 'Achilles tendon'/exp OR 'Tendinopathy':ab,ti OR 'Tendon':ab,ti OR 'Tendon disorder':ab,ti OR 'Tendon injuries':ab,ti OR 'Tendinosis':ab,ti OR 'Tendinitis':ab,ti OR 'Tennis elbow':ab,ti OR 'Elbow Tendinopathy':ab,ti OR 'Lateral epicondylitis':ab,ti OR 'Lateral epicondylosis':ab,ti OR 'Golfers elbow':ab,ti OR 'Rotator cuff':ab,ti OR 'Rotator Cuff Injuries':ab,ti OR 'De Quervain disease':ab,ti OR 'Jumpers knee':ab,ti OR 'Achilles tendon':ab,ti) AND ('Stem cells'/exp OR 'Mesenchymal stem cells'/exp OR 'Progenitor cells'/exp OR 'Mother cells'/exp OR 'Multipotent'/exp OR 'Pluripotent'/exp OR 'Totipotent'/exp OR 'Stem cells':ab,ti OR 'Mesenchymal stem cells':ab,ti OR 'Progenitor cells':ab,ti OR 'Mother cells':ab,ti OR 'Multipotent':ab,ti OR 'Pluripotent':ab,ti OR 'Totipotent':ab,ti)

**Cochrane library (20210302), 39 articles**

(Tendinopathy OR Tendon OR Tendon disorder OR Tendon injuries OR Tendinosis OR Tendinitis OR Tennis elbow OR Elbow Tendinopathy OR Lateral epicondylitis OR Lateral epicondylosis OR Golfer's elbow OR Rotator cuff OR Rotator Cuff Injuries OR De Quervain disease OR Jumper's knee OR Achilles tendon) AND (Stem cells OR Mesenchymal stem cells OR Progenitor cells OR Mother cells OR Multipotent OR Pluripotent OR Totipotent)
